# Supplementary material
Source: PubMed Central journal article supplement (PMC2797837)
Supplement: NIHMS148388-supplement-Supp_Mat.pdf [file NIHMS148388-supplement-Supp_Mat.pdf]

## Online Supporting Information

### **Analysis of Human *CYP1A1* and *CYP1A2* Genes and Their Shared Bidirectional Promoter in Eight World Populations**

Lucia F. Jorge-Nebert, Zhengwen Jiang<sup>†</sup>, Ranajit Chakraborty, Joanna Watson, Li Jin<sup>†</sup>,  
Stephen T. McGarvey<sup>‡</sup>, Ranjan Deka, and Daniel W. Nebert\*

Department of Environmental Health, and Center for Environmental Genetics (CEG)  
University of Cincinnati Medical Center, Cincinnati, Ohio 45267-0056

<sup>†</sup>Current address: Chinese Academy of Sciences and Max Planck Society Partner Institute for  
Computational Biology, Shanghai Institutes for Biological Sciences, Chinese Academy of  
Sciences, Shanghai 200031, China

<sup>‡</sup>International Health Institute  
Brown University, Providence, Rhode Island 02912

\*To whom correspondence should be addressed:

Daniel W. Nebert  
Univ Cincinnati Med Center  
Environmental Health  
PO Box 670056  
Cincinnati  
Ohio  
45267-0056  
United States  
Phone: 513-821-4664  
Fax: 513-821-4664  
Email: dan.nebert@uc.edu

**SUPP. TABLE S1. One Hundred Six SNPs across the *CYP1A1\_CYP1A2* Locus Genes, Found during Our Studies of Eight World Populations**

| SNP # | SNP Name                | Relative Position | NCBI Assignment    | SNP Property | 5' Flanking reference sequence  |
|-------|-------------------------|-------------------|--------------------|--------------|---------------------------------|
|       | XRE II 1                | CYP1A1 +4732      |                    |              |                                 |
| 1     | <b>g.72798247C&gt;T</b> | CYP1A1 +4245      | <b>rs17861080</b>  | 3' END       | CGTCTCAAAAAAAAAAAGACCTGGAAATCT  |
| 2     | <b>g.72798250G&gt;A</b> | CYP1A1 +4242      | <b>rs17861081</b>  | 3' END       | CTCAAAAAAAAAAAGACCTGGAAATCTCGC  |
| 3     | <b>g.72798264A&gt;G</b> | CYP1A1 +4228      | <b>rs17861082</b>  | 3' END       | GACCTGGAAATCTCGCGGTGCCCACTCCCC  |
| 4     | <b>g.72798694A&gt;G</b> | CYP1A1 +3798      | <b>rs4646903</b>   | 3' END       | GAGGCTGAGGTGGGAGAATCGTGTGAGCCC  |
| 5     | <b>g.72799072G&gt;T</b> | CYP1A1 +3420      | <b>rs17861084</b>  | 3' UTR       | GCTCTTATGCAAGCATGCAAGCTCAATGCA  |
| 6     | <b>g.72799170C&gt;A</b> | CYP1A1 +3322      | <b>rs17861085</b>  | 3' UTR       | GGGAGACCAATAGAAGGTAATTGAAATACC  |
| 7     | <b>g.72799175C&gt;G</b> | CYP1A1 +3317      | <b>rs17861086</b>  | 3' UTR       | ACCAATAGAAGGTAATTGAAATACCCCCC   |
| 8     | <b>g.72799260A&gt;G</b> | CYP1A1 +3232      | <b>rs4986884</b>   | 3' UTR       | TCCCCGCAGACACAAGTCCCCAGCCCCCTCC |
|       | <b>g.72799270T&gt;C</b> | CYP1A1 +3222      | <b>rs4986883</b>   | 3' UTR       | CACAAGTCCCCAGCCCCCTCCAGGACAGCAA |
| 9     | <b>g.72799524T&gt;C</b> | CYP1A1 +2968      | <b>rs4986882</b>   | 3' UTR       | GTTCTAAGTCTGCTGAAGCCAGTCAGCACCC |
| 10    | <b>g.72799540G&gt;C</b> | CYP1A1 +2952      | <b>rs4986881</b>   | 3' UTR       | GCCAGTCAGCACCCCTCACAGAGCCAGCTAG |
| 11    | <b>g.72799697G&gt;A</b> | CYP1A1 +2795      | <b>rs4986880</b>   | 3' UTR       | GTTTTACCTGTTGTCTCTGGAGGGTGTGCA  |
| 12    | <b>g.72800038T&gt;C</b> | CYP1A1 +2454      | <b>rs1048943</b>   | p.Ile462Val  | CCAGGAAGAGAAAGACCTCCCAGCGGGCAA  |
| 13    | <b>g.72800040G&gt;T</b> | CYP1A1 +2452      | <b>rs1799814</b>   | p.Thr461Asn  | AGGAAGAGAAAGACCTCCCAGCGGGCAATG  |
|       | XRE II 2                | CYP1A1 +1069      |                    |              |                                 |
| 14    | <b>g.72801524C&gt;T</b> | CYP1A1 +968       | <b>ss159100334</b> | INTRON 2     | AAAGTTCTATTTCCCTGCCAAGGAAGAAGA  |
| 15    | <b>g.72802170C&gt;A</b> | CYP1A1 +322       | <b>ss159100335</b> | p.Asp108Tyr  | CATTACTGATGAGGGTGAAGGTGTAGAGGT  |
| 16    | <b>g.72802230C&gt;T</b> | CYP1A1 +262       | <b>ss159100336</b> | p.Gly88Ser   | GCACCAGGGCCTGCCGGATGGTGTCCAGGC  |
| 17    | <b>g.72802259A&gt;G</b> | CYP1A1 +233       | <b>rs17861094</b>  | p.Ile78Thr   | CCGCTCAGCACCACCACGGGTGTGGAGCCA  |
| 18    | <b>g.72802358C&gt;T</b> | CYP1A1 +134       | <b>rs4646422</b>   | p.Gly45Asp   | AGGGTCAGCATGTGCCAATCAGAGGCCAG   |
| 19    | <b>g.72803245G&gt;A</b> | CYP1A1 -754       | <b>rs4646421</b>   | INTRON 1     | TTCCCTGGAAATTTCCAGCTGCTGTCACAT  |
| 20    | <b>g.72803860A&gt;C</b> | CYP1A1 -1369      | <b>rs17861097</b>  | INTRON 1     | ATTTCAACATCTGAGAGAGGGTAAGACAAG  |
| 21    | <b>g.72804229C&gt;A</b> | CYP1A1 -1738      | <b>rs2606345</b>   | INTRON 1     | TTCCAGCTCCCTGCAGTTGGCAATCTGTCA  |
| 22    | <b>g.72805066G&gt;A</b> | CYP1A1 -2575      | <b>ss159100337</b> | PROMOTER     | TCTCTGGGATTGGAGAGAAAGGTGGCGGAG  |
| 23    | <b>g.72805087G&gt;A</b> | CYP1A1 -2596      | <b>ss159100338</b> | PROMOTER     | GTGGCGGAGGGCGGCGGGGTGGGGGTTCG   |
| 24    | <b>g.72805088G&gt;A</b> | CYP1A1 -2597      | <b>ss159100339</b> | PROMOTER     | TGGCGGAGGGCGGCGGGGTGGGGGTTCG    |

| SNP # | SNP Name                | Relative Position   | NCBI Assignment    | SNP Property    | 5' Flanking reference sequence        |
|-------|-------------------------|---------------------|--------------------|-----------------|---------------------------------------|
| 25    | <b>g.72805175G&gt;A</b> | <b>CYP1A1 -2684</b> | <b>ss159100340</b> | <b>PROMOTER</b> | <b>CTGGGAACACCTGGAAGTCCCAATCCAAG</b>  |
|       | new AHRE                | CYP1A1 -2825        |                    |                 |                                       |
| 26    | <b>g.72805393C&gt;T</b> | CYP1A1 -2902        | <b>rs17861099</b>  | PROMOTER        | GGCGGGGGCGGGGCTGCCCCGTGGTGACCT        |
|       | AHRE1                   | CYP1A1 -2928        |                    |                 |                                       |
|       | AHRE2                   | CYP1A1 -3323        |                    |                 |                                       |
|       | <b>g.72805870C&gt;T</b> | <b>CYP1A1 -3379</b> | <b>rs4646418</b>   | <b>PROMOTER</b> | <b>GGGGGCAGAGGTCAGGCGGCCCGTCCCCGC</b> |
|       | AHRE3                   | CYP1A1 -3411        |                    |                 |                                       |
| 27    | <b>g.72805943A&gt;C</b> | CYP1A1 -3452        | <b>rs3826041</b>   | PROMOTER        | GGACCGGAGGCCCGCGCAGCCACCCAGCCG        |
| 28    | <b>g.72805958C&gt;T</b> | CYP1A1 -3467        | <b>rs3826042</b>   | PROMOTER        | CGCAGCCACCCAGCCGACCCATTCCCCGGC        |
|       | AHRE4                   | CYP1A1 -3492        |                    |                 |                                       |
| 29    | <b>g.72805984G&gt;C</b> | CYP1A1 -3493        | <b>rs4646417</b>   | PROMOTER        | GGCCCGGCGCGGGGGCTCGCAGTCACGCGA        |
|       | <b>g.72805985G&gt;A</b> | <b>CYP1A1 -3494</b> | <b>rs17861104</b>  | <b>PROMOTER</b> | <b>GCCCCGCGCGGGGGCTCGCAGTCACGCGAG</b> |
|       | AHRE5                   | CYP1A1 -3810        |                    |                 |                                       |
| 30    | <b>g.72806502C&gt;T</b> | CYP1A1 -4011        | <b>rs2470893</b>   | PROMOTER        | AACTACTATGTGCCAGGAGCTGTTTCGGAGG       |
| 31    | <b>g.72806896T&gt;C</b> | CYP1A1 -4405        | <b>rs7495708</b>   | PROMOTER        | <b>CCTGGCCAATATGGCAAACCCCATCTCTA</b>  |
|       | AHRE6                   | CYP1A1 -4553        |                    |                 |                                       |
| 32    | <b>g.72807071G&gt;A</b> | CYP1A1 -4580        | <b>rs17861107</b>  | PROMOTER        | GCCACTGCACTCCAGCCTGGGTGACAGAGC        |
| 33    | <b>g.72807300C&gt;A</b> | CYP1A1 -4809        | <b>rs17861108</b>  | PROMOTER        | GCAGGGAGCACCCATTGAGAGACATGAGA         |
| 34    | <b>g.72807303C&gt;A</b> | CYP1A1 -4812        | <b>rs17861109</b>  | PROMOTER        | <b>GGGAGCACCCCATGAGAGACATGAGACTT</b>  |
|       | AHRE7                   | CYP1A1 -5504        |                    |                 |                                       |
| 35    | <b>g.72809516C&gt;G</b> | CYP1A1 -7025        | <b>rs17861110</b>  | PROMOTER        | <b>TATAGCCCCGACCCAACCTGCCACTTCTTT</b> |
|       | new AHRE                | CYP1A1 -7504        |                    |                 |                                       |
| 36    | <b>g.72810325A&gt;C</b> | CYP1A1 -7834        | <b>rs17861111</b>  | PROMOTER        | ACAGACTCAGCCCCTGGGCCAGGGCCCCTC        |
|       | AHRE8                   | CYP1A1 -8040        |                    |                 |                                       |
|       | XRE II 3                | CYP1A1 -8045        |                    |                 |                                       |
| 37    | <b>g.72810752A&gt;G</b> | CYP1A1 -8261        | <b>rs936225</b>    | PROMOTER        | CAAGCAAGATCCACAGCAAACCCCTGCCCC        |
| 38    | <b>g.72811935G&gt;A</b> | CYP1A1 -9444        | <b>rs17861113</b>  | PROMOTER        | AGCAGATCTGGGAGATGAGGGGAGGAAGCG        |
| 39    | <b>g.72812040C&gt;T</b> | CYP1A1 -9549        | <b>rs17861114</b>  | PROMOTER        | CTGTTAAAAAACCAATATCACCATCACCTC        |
| 40    | <b>g.72812273C&gt;G</b> | <b>CYP1A1 -9782</b> | <b>ss159100341</b> | <b>PROMOTER</b> | <b>CAGGCCCCAAGAAGACCTACCCAGGTTGAA</b> |
| 41    | <b>g.72812385C&gt;T</b> | CYP1A1 -9894        | <b>rs17861115</b>  | PROMOTER        | TGGGAGGCAAATTGTATCTCCAGAAGACCC        |

| SNP # | SNP Name      | Relative Position | NCBI Assignment | SNP Property | 5' Flanking reference sequence  |
|-------|---------------|-------------------|-----------------|--------------|---------------------------------|
| 42    | g.72812867T>C | CYP1A1 -10376     | rs12441817      | PROMOTER     | AGTCTGGAGAGACAAGTGGAAAGCATCTAG  |
| 43    | g.72813041C>T | CYP1A1 -10550     | rs4886605       | PROMOTER     | GTTACATGCATAGATTGCAAAGTGGTCAGG  |
| 44    | g.72813202G>A | CYP1A1 -10711     | rs17861118      | PROMOTER     | CAGTATGCCTTCTCCTATAGTTTTGTTTTT  |
| 45    | g.72813680C>A | CYP1A1 -11189     | rs11631784      | PROMOTER     | CCGATTATTTAAAAGTATGTGGCACCTCCC  |
| 46    | g.72814232A>G | CYP1A1 -11741     | rs17861120      | PROMOTER     | TCCAAGACAGTCAGCTGAATGGATCCCCTC  |
| 47    | g.72814485G>A | CYP1A1 -11994     | rs17861121      | PROMOTER     | TTAAAGTCTCCAGGTTCCCTCCCAACAGGAT |
|       | XRE II 4      | CYP1A2 -12783     |                 |              |                                 |
|       | AHRE9         | CYP1A2 -11993     |                 |              |                                 |
|       | AHRE10        | CYP1A2 -11822     |                 |              |                                 |
| 48    | g.72818979C>T | CYP1A2 -10154     | rs17861122      | PROMOTER     | AGGTGTGGATGATGTGATGGCCAGAGCTAC  |
| 49    | g.72818980G>A | CYP1A2 -10153     | rs11632547      | PROMOTER     | GGTGTGGATGATGTGATGGCCAGAGCTACC  |
| 50    | g.72819195A>T | CYP1A2 -9938      | rs17861124      | PROMOTER     | GAGAACTAACCAGGATAGTGTAGTACCA    |
| 51    | g.72819208G>A | CYP1A2 -9925      | rs17861125      | PROMOTER     | AGGATAGTGTAGTACCAATGGACTAGTAAC  |
| 52    | g.72819500C>T | CYP1A2 -9633      | rs11632706      | PROMOTER     | TCTAGAGGACAAAGATTTTCAGCACTACC   |
| 53    | g.72819544G>A | CYP1A2 -9589      | rs11632814      | PROMOTER     | TCTTTTTTCATCTGTTTGCCTGCATATTGGC |
| 54    | g.72819640G>A | CYP1A2 -9493      | rs16972208      | PROMOTER     | GCACAACCTACGCTCAAAGAATATGTTGA   |
| 55    | g.72819929C>T | CYP1A2 -9204      | rs11633861      | PROMOTER     | GCTGCAGTGAGCCATGATGGTGCCACTATA  |
|       | AHRE11        | CYP1A2 -9145      |                 |              |                                 |
| 56    | g.72820071A>C | CYP1A2 -9062      | ss159100342     | PROMOTER     | ATGGCATCTTGGTGTACATACCAGGAGAGAG |
| 57    | g.72820286G>T | CYP1A2 -8847      | ss159100343     | PROMOTER     | ATGGGGAAGAAGTGGTTGGAAGGAAGGTTG  |
| 58    | g.72820374G>T | CYP1A2 -8759      | rs17861130      | PROMOTER     | ATTGTCCCCACTGGCTGGTGGGAAAATTGT  |
| 59    | g.72820453A>G | CYP1A2 -8680      | rs2472299       | PROMOTER     | TCACATGTTGAGCTGAGGAGTTCAAGCTTT  |
| 60    | g.72820546G>A | CYP1A2 -8587      | rs17861132      | PROMOTER     | CAACTTCAGAGACTTCACTTGAGTGGCAGC  |
| 61    | g.72820629G>A | CYP1A2 -8504      | rs17861133      | PROMOTER     | TGGCTACTTAAATTTAAAATTAGGCCAGGC  |
| 62    | g.72820857G>A | CYP1A2 -8276      | rs17861134      | PROMOTER     | CCCATGAGGTCAAGGTTGCAGTGAGCCAAG  |
| 63    | g.72820915C>T | CYP1A2 -8218      | rs17861135      | PROMOTER     | ACAGAGTGAGACCCTTTTTTAAAAACAAAA  |
| 64    | g.72820962A>G | CYP1A2 -8171      | rs2472300       | PROMOTER     | ACCTCACAGGGTGGCTATAAAGCTAAAACA  |
| 65    | g.72821129T>C | CYP1A2 -8004      | rs17861137      | PROMOTER     | GGGCAGGTGAGCATTCTTACTTGTGAACAC  |
| 66    | g.72821229G>T | CYP1A2 -7904      | rs17861138      | PROMOTER     | CCCCACTAGCCATGGATACCAAAATCTATG  |
|       | XRE II 5      | CYP1A2 -7623      |                 |              |                                 |

| SNP # | SNP Name                | Relative Position  | NCBI Assignment   | SNP Property    | 5' Flanking reference sequence       |
|-------|-------------------------|--------------------|-------------------|-----------------|--------------------------------------|
| 67    | <b>g.72821686A&gt;G</b> | CYP1A2 -7447       | <b>rs17861139</b> | PROMOTER        | AAAAAAAAAAAAAAGATTTGTTAGTTATACT      |
|       | XRE II 6                | CYP1A2 -7290       |                   |                 |                                      |
| 68    | <b>g.72821975G&gt;A</b> | CYP1A2 -7158       | <b>rs17861140</b> | PROMOTER        | GCAGTATGGAGGCTGTGGGAACCTTAAGTGC      |
| 69    | <b>g.72822042C&gt;T</b> | CYP1A2 -7091       | <b>rs17861141</b> | PROMOTER        | GCAGGGTATAAAAATGATGAGCCAAAGTGGC      |
| 70    | <b>g.72822176G&gt;A</b> | CYP1A2 -6957       | <b>rs17861142</b> | PROMOTER        | AGTGAACAGAAACTGCTGCTGAAGCCTTTG       |
|       | <b>g.72822189G&gt;A</b> | CYP1A2 -6944       | <b>rs17861143</b> | PROMOTER        | TGCTGCTGAAGCCTTTGAGTGCTAAGCAA        |
| 71    | <b>g.72822309T&gt;C</b> | CYP1A2 -6824       | <b>rs2445618</b>  | PROMOTER        | AAAGATCAAAAATATCCAGTGGTGGCCAGG       |
| 72    | <b>g.72822437A&gt;G</b> | CYP1A2 -6696       | <b>rs17861145</b> | PROMOTER        | AACTCTGTCCCTCCTAAAGATACAAAAATT       |
|       | AHRE12                  | CYP1A2 -5597       |                   |                 |                                      |
|       | XRE II 7                | CYP1A2 -4575       |                   |                 |                                      |
|       | XRE II 8                | CYP1A2 -4103       |                   |                 |                                      |
|       | E-BOX6                  | CYP1A2 -3813       |                   |                 |                                      |
|       | E-BOX5                  | CYP1A2 -3670       |                   |                 |                                      |
|       | AHRE13                  | CYP1A2 -3390       |                   |                 |                                      |
|       | E-BOX4                  | CYP1A2 -3380       |                   |                 |                                      |
|       | E-BOX3                  | CYP1A2 -3098       |                   |                 |                                      |
|       | E-BOX2                  | CYP1A2 -2924       |                   |                 |                                      |
|       | E-BOX1                  | CYP1A2 -2294       |                   |                 |                                      |
| 73    | <b>g.72827329A&gt;G</b> | CYP1A2 -1804       | <b>rs2069524</b>  | PROMOTER        | CTTGAACACCTGATCTCAGGTGATCCGCCC       |
| 74    | <b>g.72827425T&gt;C</b> | CYP1A2 -1708       | <b>rs2069525</b>  | PROMOTER        | TTTTTAACAGAACCATTCAAAGGAGGTTG        |
| 75    | <b>g.72828394T&gt;G</b> | CYP1A2 -739        | <b>rs2069526</b>  | INTRON 1        | AAGACGGGGAGCCTGGGCTAGGTGTAGGGG       |
| 76    | <b>g.72828400G&gt;C</b> | <b>CYP1A2 -733</b> | <b>rs28399417</b> | <b>INTRON 1</b> | <b>GGGAGCCTGGGCTAGGTGTAGGGGTCTGA</b> |
| 77    | <b>g.72828784C&gt;G</b> | CYP1A2 -349        | <b>rs17861149</b> | INTRON 1        | C'TTTGGTACAATACCCAGCATGCATGCTGTG     |
| 78    | <b>g.72828955G&gt;A</b> | CYP1A2 -178        | <b>rs17861150</b> | INTRON 1        | CCAGCTCTCAGATTCTGTGATGCTCAAAGG       |
| 79    | <b>g.72828970C&gt;A</b> | CYP1A2 -163        | <b>rs762551</b>   | INTRON 1        | TGTGATGCTCAAAGGGTGAGCTCTGTGGGC       |
| 80    | <b>g.72829185C&gt;G</b> | CYP1A2 +53         | <b>rs17861152</b> | p.Ser18Cys      | CCTTCTCGGCCACAGAGCTTCTCCTGGCCT       |
| 81    | <b>g.72829381G&gt;T</b> | CYP1A2 +249        | <b>rs17861153</b> | Syn.            | GGACGTCTGCAGATCCGCATTGGCTCCAC        |
| 82    | <b>g.72829438C&gt;T</b> | CYP1A2 +306        | <b>rs17861154</b> | Syn.            | CACCATCCGGCAGGCCCTGGTGCGGCAGGG       |
| 83    | <b>g.72829747C&gt;T</b> | CYP1A2 +615        | <b>rs17861155</b> | Syn.            | AGTGGCCAACGTCAATTGGTGCCATGTGCTT      |
| 84    | <b>g.72830334C&gt;T</b> | CYP1A2 +1202       | <b>rs4646425</b>  | INTRON 2        | TGTCACGTTGCTTCCCTGTGTTCACACTAA       |

| SNP # | SNP Name                | Relative Position   | NCBI Assignment    | SNP Property       | 5' Flanking reference sequence         |
|-------|-------------------------|---------------------|--------------------|--------------------|----------------------------------------|
| 85    | <b>g.72830564T&gt;C</b> | <b>CYP1A2 +1432</b> | <b>ss159100344</b> | <b>INTRON 2</b>    | <b>CTTTGACCTTGGAAGTGCCAGAGGTGCCCC</b>  |
| 86    | g.72830645C>A           | CYP1A2 +1513        | <b>rs17861157</b>  | p.Ser298Arg        | CAAGCACAGCAAGAAGGGGCCTAGAGCCAG         |
| 87    | <b>g.72830646G&gt;A</b> | <b>CYP1A2 +1514</b> | <b>rs35796837</b>  | <b>p.Gly299Ser</b> | <b>AAGCACAGCAAGAAGGGGCCTAGAGCCAGC</b>  |
| 88    | <b>g.72830947C&gt;A</b> | <b>CYP1A2 +1815</b> | <b>ss159100345</b> | <b>INTRON 3</b>    | <b>TCCCCATCTGAACAATAAGGTGTTCTCTGG</b>  |
| 89    | g.72831290G>A           | CYP1A2 +2159        | <b>rs2472304</b>   | INTRON 4           | CCCCAACCTATAGCCAGGAGAAGCCTTGA          |
| 80    | <b>g.72831453G&gt;C</b> | <b>CYP1A2 +2321</b> | <b>rs3743484</b>   | <b>INTRON 4</b>    | <b>AGTCTTACATAAGAGTGACATGGGGTATAA</b>  |
| 91    | g.72831746G>A           | CYP1A2 +2614        | <b>rs17861159</b>  | INTRON 5           | GCCCTGGCTCAGCATCTCCTTCCCGACCTC         |
| 92    | <b>g.72832260G&gt;C</b> | <b>CYP1A2 +3128</b> | <b>ss159100346</b> | <b>INTRON 5</b>    | <b>GAAATTCCTCCGGGGCTGCCCCAGGCTGCCT</b> |
| 93    | <b>g.72832387C&gt;A</b> | <b>CYP1A2 +3255</b> | <b>ss159100347</b> | <b>INTRON 5</b>    | <b>AGCCAGGCGCAAAGAGAAGTTTAGTAAATA</b>  |
| 94    | g.72832745T>C           | CYP1A2 +3613        | <b>rs4646427</b>   | INTRON 6           | AGGCTGTTTGTCCCTGCTAGGAAGTGTTA          |
| 95    | <b>g.72833457T&gt;C</b> | <b>CYP1A2 +4325</b> | <b>ss159100348</b> | <b>INTRON 6</b>    | <b>GTAGGATGAAGAAACGTATGTCTTCTTTTC</b>  |
| 96    | <b>g.72833665A&gt;G</b> | <b>CYP1A2 +4533</b> | <b>ss159100349</b> | <b>INTRON 6</b>    | <b>ATTTAAAGTAAATTAATATTTAAAGGCACT</b>  |
| 97    | g.72834479C>T           | CYP1A2 +5347        | <b>rs2470890</b>   | Syn.               | TGTCCAGGCGCGGCTGCGCTTCTCCATCAA         |
| 98    | <b>g.72834527C&gt;T</b> | <b>CYP1A2 +5395</b> | <b>ss159100350</b> | <b>3' UTR</b>      | <b>TTCTGAGGCCAGGGAGCGAGTGGGGGCCAG</b>  |
|       | XRE II 10               | CYP1A2 +6223        |                    |                    |                                        |
| 99    | g.72835806C>G           | CYP1A2 +6674        | <b>rs17861162</b>  | 3' UTR             | GTGCTGGCATTACAGGTGTGAGCCACGGTG         |
| 100   | g.72835817A>G           | CYP1A2 +6685        | <b>rs17861163</b>  | 3' UTR             | ACAGGTGTGAGCCACGGTGCCCGGCCACA          |
| 101   | g.72836881G>A           | CYP1A2 +7749        | <b>rs17861164</b>  | 3' END             | GATGCCTCACCCCTGTAATTCCAGCACTTC         |
| 102   | <b>g.72836996G&gt;A</b> | <b>CYP1A2 +7864</b> | <b>rs2960192</b>   | <b>3' END</b>      | <b>TACAAAATTAGCCAGGCATGGTGGCGGGC</b>   |

**Green background:** SNPs detected in a large panel of subjects and not included in the genetic analysis. **Yellow background:** 60 SNPs found in resequencing of the Oceanian/Amerindian samples (current study). **Yellow background with red letters:** 21 SNPs found only during the Oceanian/Amerindian resequencing (current study). Of these, 17 are new and unreported and have been assigned dbSNP ss numbers. **Yellow background with black letters:** 39 SNPs found in the resequencing of all populations—AF, AS, CA, OC, AM (Jiang et al., 2005) plus two Oceanians and three Amerindian populations (current study). **In clear background with black letters:** 46 SNPs found only during the resequencing of AF, AS, CA, OC, AM (Jiang et al., 2005). Relative positions listed are calculated with respect to the translation start codon. To transform these to positions relative to TSS, for *CYP1A1*: a) add 2,439 if position  $\geq +1$ ; b) add 2,440 if  $-1 \geq \text{position} \geq -2,439$ ; c) add 2,439 if position  $< -2,439$ . For *CYP1A2*: a) add 896 if position  $\geq +1$ ; b) add 897 if  $-1 \geq \text{position} \geq -896$ ; c) add 896 if position  $< -896$ . Only 102 SNPs included in the genetic analysis have received a SNP number.

**SUPP. TABLE S2. Two Hundred Ninety-Five SNPs across the *CYP1A1\_CYP1A2* Locus—  
278 SNPs Previously Reported plus the 17 New SNPs Found in the Present Study**

| CHROMOSOMAL<br>POSITION | REFERENCE<br>SEQUENCE<br>NUMBER | RELATIVE<br>POSITION | ROLE              | In a<br>masked<br>area |
|-------------------------|---------------------------------|----------------------|-------------------|------------------------|
| <b><i>CYP1A1</i></b>    |                                 |                      |                   |                        |
| chr15:72789002          | rs28693826                      | 13490 G/T            | 3' flank          |                        |
| chr15:72789886          | rs35669097                      | 12606 A/G            | 3' flank          |                        |
| chr15:72789925          | rs34160031                      | 12567 A/G            | 3' flank          |                        |
| chr15:72790104          | rs1456432                       | 12388 A/G            | 3' flank          |                        |
| chr15:72790126          | rs34465004                      | 12366 C/G            | 3' flank          |                        |
| chr15:72790130          | rs35646069                      | 12362 A/G            | 3' flank          |                        |
| chr15:72790305          | rs28371819                      | 12187 A/G            | 3' flank          |                        |
| chr15:72790561          | rs6495121                       | 11931 G/T            | 3' flank          |                        |
| chr15:72792628          | rs28689146                      | 9864 A/T             | 3' flank          |                        |
| chr15:72792678          | rs12915975                      | 9814 A/G             | 3' flank          |                        |
| chr15:72794607          | rs35570076                      | 7885 A/G             | 3' flank          |                        |
| chr15:72794702          | rs35857345                      | 7790 C/T             | 3' flank          |                        |
| chr15:72794814          | rs2472308                       | 7678 G/T             | 3' flank          |                        |
| chr15:72794835          | rs36098749                      | 7657 C/G             | 3' flank          |                        |
| chr15:72794853          | rs2472309                       | 7639 G/T             | 3' flank          |                        |
| chr15:72798054          | rs28661955                      | 4438 C/T             | 3' flank          |                        |
| chr15:72798247          | rs17861080                      | 4245 C/T             | 3' flank          |                        |
| chr15:72798250          | rs17861081                      | 4242 A/G             | 3' flank          |                        |
| chr15:72798264          | rs17861082                      | 4228 A/G             | 3' flank          |                        |
| chr15:72798694          | rs4646903                       | 3798 C/T             | 3' flank          |                        |
| chr15:72798907          | rs2515900                       | 3585 A/G             | 3' flank          |                        |
| chr15:72798908          | rs2472307                       | 3584 C/T             | 3' flank          |                        |
| chr15:72798965          | rs28427336                      | 3527 C/G             | 3'-UTR            |                        |
| chr15:72799072          | rs17861084                      | 3420 G/T             | 3'-UTR            |                        |
| chr15:72799169          | rs28399432                      | 3323 C/G             | 3'-UTR            |                        |
| chr15:72799170          | rs17861085                      | 3322 A/C             | 3'-UTR            |                        |
| chr15:72799175          | rs17861086                      | 3317 C/G             | 3'-UTR            |                        |
| chr15:72799260          | rs4986884                       | 3232 C/T             | 3'-UTR            |                        |
| chr15:72799270          | rs4986883                       | 3222 A/G             | 3'-UTR            |                        |
| chr15:72799288          | rs1800031                       | 3204 C/T             | 3'-UTR            |                        |
| chr15:72799417          | rs35427048                      | 3075 C/T             | 3'-UTR            |                        |
| chr15:72799524          | rs4986882                       | 2968 A/G             | 3'-UTR            |                        |
| chr15:72799535          | rs28399431                      | 2957 C/T             | 3'-UTR            |                        |
| chr15:72799540          | rs4986881                       | 2952 C/G/T           | 3'-UTR            |                        |
| chr15:72799697          | rs4986880                       | 2795 C/T             | 3'-UTR            |                        |
| chr15:72799798          | rs2606346                       | 2694 C/T             | 3'-UTR            |                        |
| chr15:72799947          | rs28399430                      | 2545 C/G             | Coding exon       |                        |
| chr15:72799978          | rs28399429                      | 2514 A/G             | Coding exon       |                        |
| chr15:72800014          | rs36121583                      | 2478 G/T             | Coding exon       |                        |
| chr15:72800034          | rs2278970                       | 2458 C/G             | Coding exon       |                        |
| chr15:72800038          | rs1048943                       | 2454 A/G             | Coding exon       |                        |
| chr15:72800040          | rs1799814                       | 2452 A/C             | Coding exon       |                        |
| chr15:72800277          | rs28399428                      | 2215 C/T             | Intron (boundary) |                        |
| chr15:72800616          | rs2856833                       | 1876 A/C             | Coding exon       |                        |
| chr15:72801080          | rs4987133                       | 1412 C/T             | Coding exon       |                        |
| chr15:72801102          | rs34260157                      | 1390 C/T             | Coding exon       |                        |

|                |             |       |     |                   |
|----------------|-------------|-------|-----|-------------------|
| chr15:72801524 | ss159100334 | 968   | C/T | Intron            |
| chr15:72801622 | rs4986879   | 870   | A/G | Intron (boundary) |
| chr15:72801974 | rs28399427  | 518   | C/G | Coding exon       |
| chr15:72801979 | rs28399426  | 513   | A/C | Coding exon       |
| chr15:72802098 | rs35196245  | 394   | C/G | Coding exon       |
| chr15:72802170 | ss159100335 | 322   | C/A | Coding exon       |
| chr15:72802171 | rs35267501  | 321   | C/T | Coding exon       |
| chr15:72802215 | rs2229150   | 277   | C/T | Coding exon       |
| chr15:72802230 | ss159100336 | 262   | C/T | Coding exon       |
| chr15:72802259 | rs17861094  | 233   | A/G | Coding exon       |
| chr15:72802296 | rs35035798  | 196   | A/G | Coding exon       |
| chr15:72802358 | rs4646422   | 134   | A/G | Coding exon       |
| chr15:72802524 | rs28399425  | -33   | C/T | Intron (boundary) |
| chr15:72802711 | rs34331219  | -220  | A/G | Intron            |
| chr15:72802832 | rs2606344   | -341  | G/T | Intron            |
| chr15:72802905 | rs35374834  | -414  | C/T | Intron            |
| chr15:72802932 | rs4986885   | -441  | A/G | Intron            |
| chr15:72802960 | rs35766947  | -469  | A/G | Intron            |
| chr15:72803043 | rs34268526  | -552  | A/C | Intron            |
| chr15:72803245 | rs4646421   | -754  | C/T | Intron            |
| chr15:72803260 | rs35992445  | -769  | C/T | Intron            |
| chr15:72803355 | rs34445263  | -864  | C/G | Intron            |
| chr15:72803478 | rs4646420   | -987  | C/T | Intron            |
| chr15:72803523 | rs34513002  | -1032 | C/T | Intron            |
| chr15:72803702 | rs8031941   | -1211 | G/T | Intron            |
| chr15:72803860 | rs17861097  | -1369 | A/C | Intron            |
| chr15:72804229 | rs2606345   | -1738 | A/C | Intron            |
| chr15:72804513 | rs2856844   | -2022 | C/G | Intron            |
| chr15:72804537 | rs35892217  | -2046 | C/T | Intron            |
| chr15:72804678 | rs35089928  | -2187 | A/G | Intron            |
| chr15:72804680 | rs34726614  | -2189 | A/G | Intron            |
| chr15:72805066 | ss159100337 | -2575 | G/A | Promoter          |
| chr15:72805087 | ss159100338 | -2596 | G/A | Promoter          |
| chr15:72805088 | ss159100339 | -2597 | G/A | Promoter          |
| chr15:72805175 | ss159100340 | -2684 | G/A | Promoter          |
| chr15:72805249 | rs35701229  | -2758 | C/T | Promoter          |
| chr15:72805271 | rs36099343  | -2780 | C/T | Promoter          |
| chr15:72805366 | rs35339247  | -2875 | C/T | Promoter          |
| chr15:72805383 | rs35686934  | -2892 | C/T | Promoter          |
| chr15:72805393 | rs17861099  | -2902 | C/T | Promoter          |
| chr15:72805760 | rs28588839  | -3269 | A/G | Promoter          |
| chr15:72805870 | rs4646418   | -3379 | A/G | Promoter          |
| chr15:72805943 | rs3826041   | -3452 | A/C | Promoter          |
| chr15:72805958 | rs3826042   | -3467 | C/T | Promoter          |
| chr15:72805966 | rs2856832   | -3475 | C/G | Promoter          |
| chr15:72805968 | rs2856831   | -3477 | C/G | Promoter          |
| chr15:72805984 | rs4646417   | -3493 | C/G | Promoter          |
| chr15:72805985 | rs17861104  | -3494 | A/G | Promoter          |
| chr15:72805989 | rs2472296   | -3498 | A/G | Promoter          |
| chr15:72805993 | rs2445619   | -3502 | A/G | Promoter          |
| chr15:72806191 | rs35141552  | -3700 | C/G | Promoter          |
| chr15:72806238 | rs36090160  | -3747 | A/G | Promoter          |
| chr15:72806342 | rs3809585   | -3851 | C/G | Promoter          |
| chr15:72806347 | rs36074335  | -3856 | C/T | Promoter          |
| chr15:72806396 | rs36018288  | -3905 | A/G | Promoter          |
| chr15:72806491 | rs34077361  | -4000 | A/G | Promoter          |
| chr15:72806502 | rs2470893   | -4011 | A/G | Promoter          |



|                |             |        |     |          |   |
|----------------|-------------|--------|-----|----------|---|
| chr15:72806798 | rs34458627  | -4307  | C/T | Promoter |   |
| chr15:72806896 | rs7495708   | -4405  | C/T | Promoter |   |
| chr15:72806938 | rs34069996  | -4447  | A/G | Promoter |   |
| chr15:72807050 | rs35236831  | -4559  | C/G | Promoter |   |
| chr15:72807071 | rs17861107  | -4580  | A/G | Promoter |   |
| chr15:72807300 | rs17861108  | -4809  | A/C | Promoter |   |
| chr15:72807303 | rs17861109  | -4812  | A/C | Promoter |   |
| chr15:72808964 | rs7180066   | -6473  | G/T | Promoter | x |
| chr15:72808976 | rs7179590   | -6485  | A/G | Promoter | x |
| chr15:72808984 | rs7181062   | -6493  | A/T | Promoter | x |
| chr15:72809084 | rs7179952   | -6593  | C/T | Promoter | x |
| chr15:72809183 | rs28621690  | -6692  | C/T | Promoter | x |
| chr15:72809216 | rs8039800   | -6725  | A/T | Promoter | x |
| chr15:72809225 | rs7180012   | -6734  | A/T | Promoter | x |
| chr15:72809516 | rs17861110  | -7025  | C/G | Promoter |   |
| chr15:72810325 | rs17861111  | -7834  | A/C | Promoter |   |
| chr15:72810752 | rs936225    | -8261  | A/G | Promoter |   |
| chr15:72810989 | rs7182554   | -8498  | C/T | Promoter | x |
| chr15:72811935 | rs17861113  | -9444  | A/G | Promoter |   |
| chr15:72812040 | rs17861114  | -9549  | C/T | Promoter |   |
| chr15:72812199 | rs2470892   | -9708  | C/G | Promoter |   |
| chr15:72812273 | ss159100341 | -9782  | C/G | Promoter |   |
| chr15:72812385 | rs17861115  | -9894  | C/T | Promoter |   |
| chr15:72812386 | rs2470891   | -9895  | C/T | Promoter |   |
| chr15:72812464 | rs35434501  | -9973  | A/G | Promoter |   |
| chr15:72812542 | rs35245678  | -10051 | A/G | Promoter |   |
| chr15:72812690 | rs35042613  | -10199 | A/C | Promoter |   |
| chr15:72812867 | rs12441817  | -10376 | C/T | Promoter |   |
| chr15:72813041 | rs4886605   | -10550 | C/T | Promoter |   |
| chr15:72813202 | rs17861118  | -10711 | A/G | Promoter |   |
| chr15:72813333 | rs7496533   | -10842 | A/T | Promoter |   |
| chr15:72813480 | rs7496395   | -10989 | C/T | Promoter |   |
| chr15:72813680 | rs11631784  | -11189 | A/C | Promoter |   |
| chr15:72814232 | rs17861120  | -11741 | A/G | Promoter |   |
| chr15:72814485 | rs17861121  | -11994 | A/G | Promoter |   |

**CYP1A2**

|                |             |        |     |          |  |
|----------------|-------------|--------|-----|----------|--|
| chr15:72818574 | rs2472298   | -10559 | A/G | Promoter |  |
| chr15:72818785 | rs34769904  | -10348 | A/G | Promoter |  |
| chr15:72818808 | rs35109618  | -10325 | C/T | Promoter |  |
| chr15:72818979 | rs17861122  | -10154 | C/T | Promoter |  |
| chr15:72818980 | rs11632547  | -10153 | A/G | Promoter |  |
| chr15:72818995 | rs35290120  | -10138 | A/G | Promoter |  |
| chr15:72819013 | rs34033635  | -10120 | C/T | Promoter |  |
| chr15:72819195 | rs17861124  | -9938  | A/T | Promoter |  |
| chr15:72819208 | rs17861125  | -9925  | A/G | Promoter |  |
| chr15:72819480 | rs16972198  | -9653  | A/G | Promoter |  |
| chr15:72819500 | rs11632706  | -9633  | C/T | Promoter |  |
| chr15:72819544 | rs11632814  | -9589  | A/G | Promoter |  |
| chr15:72819640 | rs16972208  | -9493  | A/G | Promoter |  |
| chr15:72819929 | rs11633861  | -9204  | C/T | Promoter |  |
| chr15:72820071 | ss159100342 | -9062  | A/C | Promoter |  |
| chr15:72820286 | ss159100343 | -8847  | G/T | Promoter |  |
| chr15:72820374 | rs17861130  | -8759  | G/T | Promoter |  |
| chr15:72820448 | rs35104183  | -8685  | C/T | Promoter |  |
| chr15:72820453 | rs2472299   | -8680  | A/G | Promoter |  |

|                |            |       |             |             |   |
|----------------|------------|-------|-------------|-------------|---|
| chr15:72820525 | rs35900399 | -8608 | C/T         | Promoter    |   |
| chr15:72820546 | rs17861132 | -8587 | A/G         | Promoter    |   |
| chr15:72820629 | rs17861133 | -8504 | A/G         | Promoter    |   |
| chr15:72820857 | rs17861134 | -8276 | A/G         | Promoter    |   |
| chr15:72820915 | rs17861135 | -8218 | C/T         | Promoter    |   |
| chr15:72820962 | rs2472300  | -8171 | A/G         | Promoter    |   |
| chr15:72821129 | rs17861137 | -8004 | C/T         | Promoter    |   |
| chr15:72821229 | rs17861138 | -7904 | G/T         | Promoter    |   |
| chr15:72821686 | rs17861139 | -7447 | A/G         | Promoter    |   |
| chr15:72821899 | rs7172415  | -7234 | C/G         | Promoter    |   |
| chr15:72821975 | rs17861140 | -7158 | A/G         | Promoter    |   |
| chr15:72822042 | rs17861141 | -7091 | C/T         | Promoter    |   |
| chr15:72822176 | rs17861142 | -6957 | A/G         | Promoter    |   |
| chr15:72822189 | rs17861143 | -6944 | A/C         | Promoter    |   |
| chr15:72822309 | rs2445618  | -6824 | C/T         | Promoter    |   |
| chr15:72822437 | rs17861145 | -6696 | A/G         | Promoter    |   |
| chr15:72822835 | rs28454554 | -6298 | A/G         | Promoter    | x |
| chr15:72823367 | rs2472301  | -5766 | A/G         | Promoter    | x |
| chr15:72823369 | rs2472302  | -5764 | C/T         | Promoter    | x |
| chr15:72825243 | rs2069512  | -3890 | A/G         | Promoter    | x |
| chr15:72825244 | rs2069513  | -3889 | A/G         | Promoter    | x |
| chr15:72825273 | rs2069514  | -3860 | A/G         | Promoter    | x |
| chr15:72825440 | rs2069515  | -3693 | A/G         | Promoter    | x |
| chr15:72825456 | rs2069516  | -3677 | A/G         | Promoter    | x |
| chr15:72825508 | rs2069517  | -3625 | C/T         | Promoter    | x |
| chr15:72825535 | rs2069519  | -3598 | G/T         | Promoter    | x |
| chr15:72825539 | rs2069520  | -3594 | G/T         | Promoter    | x |
| chr15:72825876 | rs2470894  | -3257 | G/T         | Promoter    | x |
| chr15:72825878 | rs2472303  | -3255 | A/T         | Promoter    | x |
| chr15:72826020 | rs2069521  | -3113 | A/G         | Promoter    | x |
| chr15:72826224 | rs34341603 | -2909 | G/T         | Promoter    | x |
| chr15:72826286 | rs2069522  | -2847 | C/T         | Promoter    | x |
| chr15:72826299 | rs34633714 | -2834 | C/T         | Promoter    | x |
| chr15:72826325 | rs12592480 | -2808 | A/C         | Promoter    | x |
| chr15:72826356 | rs35590132 | -2777 | A/G         | Promoter    | x |
| chr15:72827030 | rs34834171 | -2103 | A/G         | Promoter    | x |
| chr15:72827189 | rs35083748 | -1944 | A/C         | Promoter    | x |
| chr15:72827288 | rs2069523  | -1845 | A/C         | Promoter    |   |
| chr15:72827329 | rs2069524  | -1804 | A/C/<br>G/T | Promoter    |   |
| chr15:72827425 | rs2069525  | -1708 | A/C/<br>G/T | Promoter    |   |
| chr15:72827850 | rs28622071 | -1283 | A/G         | Promoter    |   |
| chr15:72828082 | rs28399416 | -1051 | C/T         | Promoter    |   |
| chr15:72828394 | rs2069526  | -739  | G/T         | Intron      |   |
| chr15:72828400 | rs28399417 | -733  | C/G         | Intron      |   |
| chr15:72828404 | rs12720461 | -729  | C/T         | Intron      |   |
| chr15:72828471 | rs35198905 | -662  | G/T         | Intron      |   |
| chr15:72828784 | rs17861149 | -349  | C/G         | Intron      |   |
| chr15:72828955 | rs17861150 | -178  | A/G         | Intron      |   |
| chr15:72828970 | rs762551   | -163  | A/C         | Intron      |   |
| chr15:72828972 | rs35858607 | -161  | A/C         | Intron      |   |
| chr15:72829185 | rs17861152 | 53    | C/G         | Coding exon |   |
| chr15:72829262 | rs3743482  | 130   | A/G         | Coding exon |   |
| chr15:72829354 | rs35407132 | 222   | C/T         | Coding exon |   |
| chr15:72829381 | rs17861153 | 249   | G/T         | Coding exon |   |
| chr15:72829438 | rs17861154 | 306   | C/T         | Coding exon |   |

|                |             |      |     |                   |   |
|----------------|-------------|------|-----|-------------------|---|
| chr15:72829442 | rs34067076  | 310  | A/G | Coding exon       |   |
| chr15:72829525 | rs34153904  | 393  | A/G | Coding exon       |   |
| chr15:72829747 | rs17861155  | 615  | C/T | Coding exon       |   |
| chr15:72829982 | rs34954622  | 850  | C/T | Intron (boundary) |   |
| chr15:72830026 | rs34182516  | 894  | C/T | Intron (boundary) |   |
| chr15:72830334 | rs4646425   | 1202 | C/T | Intron            |   |
| chr15:72830412 | rs35407489  | 1280 | A/G | Intron            |   |
| chr15:72830484 | rs34264399  | 1352 | A/G | Intron (boundary) |   |
| chr15:72830564 | ss159100344 | 1432 | T/C | Intron            |   |
| chr15:72830645 | rs17861157  | 1513 | A/C | Coding exon       |   |
| chr15:72830646 | rs35796837  | 1514 | A/G | Coding exon       |   |
| chr15:72830681 | rs34058039  | 1549 | C/T | Coding exon       |   |
| chr15:72830691 | rs28399418  | 1559 | A/G | Coding exon       |   |
| chr15:72830722 | rs28399419  | 1590 | C/T | Intron (boundary) |   |
| chr15:72830947 | ss159100345 | 1815 | C/A | Intron            |   |
| chr15:72831291 | rs2472304   | 2159 | A/G | Intron (boundary) |   |
| chr15:72831301 | rs34711134  | 2169 | A/G | Intron (boundary) |   |
| chr15:72831364 | rs34440552  | 2232 | C/T | Intron            |   |
| chr15:72831453 | rs3743484   | 2321 | C/G | Intron (boundary) |   |
| chr15:72831702 | rs28399420  | 2570 | A/G | Intron (boundary) |   |
| chr15:72831729 | rs34980540  | 2597 | A/G | Intron (boundary) |   |
| chr15:72831746 | rs17861159  | 2614 | A/G | Intron            |   |
| chr15:72831777 | rs35902286  | 2645 | C/G | Intron            |   |
| chr15:72831778 | rs28399421  | 2646 | C/T | Intron            |   |
| chr15:72831826 | rs28399422  | 2694 | A/C | Intron            |   |
| chr15:72832201 | rs34931285  | 3069 | C/G | Intron            |   |
| chr15:72832260 | ss159100346 | 3128 | G/C | Intron            |   |
| chr15:72832300 | rs2472305   | 3168 | A/G | Intron            |   |
| chr15:72832339 | rs2960195   | 3207 | C/T | Intron            |   |
| chr15:72832341 | rs2960194   | 3209 | C/T | Intron            |   |
| chr15:72832387 | ss159100347 | 3255 | C/A | Intron            |   |
| chr15:72832411 | rs36043490  | 3279 | C/G | Intron            |   |
| chr15:72832419 | rs2472306   | 3287 | A/G | Intron            |   |
| chr15:72832479 | rs4886607   | 3347 | C/T | Intron (boundary) |   |
| chr15:72832620 | rs2960193   | 3488 | C/T | Coding exon       |   |
| chr15:72832737 | rs34356615  | 3605 | A/G | Intron (boundary) |   |
| chr15:72832745 | rs4646427   | 3613 | C/T | Intron (boundary) |   |
| chr15:72833457 | ss159100348 | 4325 | T/C | Intron            |   |
| chr15:72833665 | ss159100349 | 4533 | A/G | Intron            |   |
| chr15:72833730 | rs12593808  | 4598 | G/T | Intron            | x |
| chr15:72833928 | rs12904742  | 4796 | A/G | Intron            | x |
| chr15:72834142 | rs28399423  | 5010 | C/T | Intron (boundary) |   |
| chr15:72834222 | rs28399424  | 5090 | C/T | Coding exon       |   |
| chr15:72834300 | rs34151816  | 5168 | C/T | Coding exon       |   |
| chr15:72834365 | rs4646428   | 5233 | A/T | Coding exon       |   |
| chr15:72834474 | rs35647699  | 5342 | A/G | Coding exon       |   |
| chr15:72834479 | rs2470890   | 5347 | C/T | Coding exon       |   |
| chr15:72834527 | ss159100350 | 5395 | C/T | 3'-UTR            |   |
| chr15:72834653 | rs11636419  | 5521 | A/G | 3'-UTR            | x |
| chr15:72834756 | rs28465265  | 5624 | A/C | 3'-UTR            | x |
| chr15:72835022 | rs1139497   | 5890 | A/G | 3'-UTR            |   |
| chr15:72835806 | rs17861162  | 6674 | C/G | 3'-UTR            |   |
| chr15:72835817 | rs17861163  | 6685 | A/G | 3'-UTR            |   |
| chr15:72836615 | rs7403788   | 7483 | A/T | 3' flank          |   |
| chr15:72836705 | rs35562753  | 7573 | C/T | 3' flank          |   |
| chr15:72836881 | rs17861164  | 7749 | A/G | 3' flank          |   |
| chr15:72836996 | rs2960192   | 7864 | C/T | 3' flank          |   |

|                |            |       |     |          |
|----------------|------------|-------|-----|----------|
| chr15:72837253 | rs12912043 | 8121  | A/C | 3' flank |
| chr15:72837400 | rs12912491 | 8268  | A/G | 3' flank |
| chr15:72837410 | rs12912250 | 8278  | C/T | 3' flank |
| chr15:72837426 | rs12912259 | 8294  | C/T | 3' flank |
| chr15:72837560 | rs7402578  | 8428  | C/T | 3' flank |
| chr15:72837907 | rs12591078 | 8775  | C/T | 3' flank |
| chr15:72838061 | rs11072501 | 8929  | A/G | 3' flank |
| chr15:72838672 | rs8038819  | 9540  | A/C | 3' flank |
| chr15:72839115 | rs1350194  | 9983  | A/T | 3' flank |
| chr15:72839548 | rs12903896 | 10416 | C/T | 3' flank |
| chr15:72839824 | rs11854147 | 10692 | C/T | 3' flank |
| chr15:72839873 | rs11072502 | 10741 | A/G | 3' flank |
| chr15:72839948 | rs11072503 | 10816 | C/T | 3' flank |
| chr15:72839964 | rs11072504 | 10832 | C/T | 3' flank |
| chr15:72839967 | rs12439187 | 10835 | C/T | 3' flank |
| chr15:72839980 | rs11857376 | 10848 | A/G | 3' flank |
| chr15:72839988 | rs11072505 | 10856 | A/G | 3' flank |
| chr15:72840047 | rs11072506 | 10915 | A/G | 3' flank |
| chr15:72840485 | rs11637417 | 11353 | C/G | 3' flank |
| chr15:72840495 | rs11632725 | 11363 | C/T | 3' flank |
| chr15:72841919 | rs11072507 | 12787 | C/G | 3' flank |
| chr15:72842060 | rs28610543 | 12928 | C/T | 3' flank |
| chr15:72843411 | rs11631682 | 14279 | A/G | 3' flank |
| chr15:72843934 | rs11632822 | 14802 | C/T | 3' flank |
| chr15:72844256 | rs4886406  | 15124 | A/C | 3' flank |
| chr15:72844800 | rs4886606  | 15668 | A/T | 3' flank |

---

The 106 SNPs on *grey background* were found during our studies [current study plus (Jiang et al., 2005)] of eight world populations. Relative positions listed are calculated with respect to translation start codon. To transform these to positions relative to the TSS, see Supp. Table S1 legend. SNPs marked with an “x” (in a masked area) were not surveyed in our studies, because they are located in regions with more than 85% highly-repetitive DNA, which were excluded by *RepeatMasker*.

**SUPP. TABLE S3. Comparison of Number of SNPs Found vs SNPs Not Found in Our Studies**

---

|                                                                   |     |        |
|-------------------------------------------------------------------|-----|--------|
| Total SNPs previously reported:                                   | 278 |        |
| New SNPs found in the present study:                              | 17  |        |
| Grand total:                                                      | 295 |        |
|                                                                   |     |        |
| Reported SNPs located outside our resequenced area:               |     |        |
| SNPs downstream of <i>CYP1A1</i> +5000                            | 15  |        |
| SNPs downstream of <i>CYP1A2</i> +8000                            | 26  |        |
| SNPs in masked areas:                                             | 33  |        |
| Total:                                                            | 74  |        |
|                                                                   |     |        |
| SNPs previously reported and newly found in the resequenced area: | 221 | (100%) |
|                                                                   |     |        |
| SNPs found in the resequencing of same area:                      | 106 | (48%)  |
| SNPs not found in the resequencing of same area:                  | 115 | (52%)  |

---

The SNPs reported previously include all SNPs found in the present study, plus those found previously by us (Jiang et al., 2005), plus those in dbSNP.

**SUPP. TABLE S4. Frequency of 102 Individual SNPs across the *CYP1A1*\_*CYP1A2* Locus in Eight World Populations**

| SNP # | SNP Name      | Relative Position   | NCBI Assignment    | A1 | A2 | Ancestral | P <sub>A2</sub> in Africans | P <sub>A2</sub> in Caucasians | P <sub>A2</sub> in Asians | P <sub>A2</sub> in Samoans | P <sub>A2</sub> in New Guineans | P <sub>A2</sub> in Pehuenche | P <sub>A2</sub> in Teribe | P <sub>A2</sub> in Dogrib |
|-------|---------------|---------------------|--------------------|----|----|-----------|-----------------------------|-------------------------------|---------------------------|----------------------------|---------------------------------|------------------------------|---------------------------|---------------------------|
| 1     | g.72798247C>T | <i>CYP1A1</i> +4245 | <b>rs17861080</b>  | C  | T  | C         | 1/12                        | 0/14                          | 0/8                       | 0/24                       | 0/16                            | 0/8                          | 0/8                       | 0/16                      |
| 2     | g.72798250G>A | <i>CYP1A1</i> +4242 | <b>rs17861081</b>  | G  | A  | G         | 3/12                        | 0/14                          | 0/8                       | 0/24                       | 0/16                            | 0/8                          | 0/8                       | 0/16                      |
| 3     | g.72798264A>G | <i>CYP1A1</i> +4228 | <b>rs17861082</b>  | A  | G  | G*        | 3/12                        | 0/14                          | 0/8                       | 0/24                       | 0/16                            | 0/8                          | 0/8                       | 0/16                      |
| 4     | g.72798694A>G | <i>CYP1A1</i> +3798 | <b>rs4646903</b>   | A  | G  | A         | 3/12                        | 1/12                          | 2/6                       | 14/24                      | 14/14                           | 7/8                          | 3/8                       | 5/16                      |
| 5     | g.72799072G>T | <i>CYP1A1</i> +3420 | <b>rs17861084</b>  | G  | T  | G         | 2/12                        | 0/14                          | 0/8                       | 0/24                       | 0/16                            | 0/8                          | 0/8                       | 0/16                      |
| 6     | g.72799170C>A | <i>CYP1A1</i> +3322 | <b>rs17861085</b>  | C  | A  | A*        | 3/12                        | 0/14                          | 0/8                       | 0/24                       | 0/16                            | 0/8                          | 0/8                       | 0/16                      |
| 7     | g.72799175C>G | <i>CYP1A1</i> +3317 | <b>rs17861086</b>  | C  | G  | C         | 0/12                        | 0/14                          | 0/8                       | 1/24                       | 0/16                            | 0/8                          | 0/8                       | 0/16                      |
| 8     | g.72799260A>G | <i>CYP1A1</i> +3232 | <b>rs4986884</b>   | A  | G  | G*        | 3/12                        | 0/14                          | 0/8                       | 0/24                       | 0/16                            | 0/8                          | 0/8                       | 0/16                      |
| 9     | g.72799524T>C | <i>CYP1A1</i> +2968 | <b>rs4986882</b>   | T  | C  | C*        | 3/12                        | 0/14                          | 0/8                       | 0/24                       | 0/16                            | 0/8                          | 0/8                       | 0/16                      |
| 10    | g.72799540G>C | <i>CYP1A1</i> +2952 | <b>rs4986881</b>   | G  | C  | C*        | 3/12                        | 0/14                          | 0/8                       | 0/24                       | 0/16                            | 0/8                          | 0/8                       | 0/16                      |
| 11    | g.72799697G>A | <i>CYP1A1</i> +2795 | <b>rs4986880</b>   | G  | A  | G         | 3/12                        | 0/14                          | 0/8                       | 0/24                       | 0/16                            | 0/8                          | 0/8                       | 0/16                      |
| 12    | g.72800038T>C | <i>CYP1A1</i> +2454 | <b>rs1048943</b>   | T  | C  | T         | 0/12                        | 0/14                          | 1/8                       | 2/24                       | 0/16                            | 7/8                          | 3/8                       | 5/16                      |
| 13    | g.72800040G>T | <i>CYP1A1</i> +2452 | <b>rs1799814</b>   | G  | T  | G         | 0/12                        | 1/14                          | 0/8                       | 0/24                       | 0/16                            | 0/8                          | 0/8                       | 0/16                      |
| 14    | g.72801524C>T | <i>CYP1A1</i> +968  | <b>ss159100334</b> | C  | T  | C         | 0/12                        | 0/14                          | 0/8                       | 0/24                       | 0/16                            | 0/8                          | 0/8                       | 1/16                      |
| 15    | g.72802170C>A | <i>CYP1A1</i> +322  | <b>ss159100335</b> | C  | A  | C         | 0/12                        | 0/14                          | 0/8                       | 1/24                       | 0/16                            | 0/8                          | 0/8                       | 0/16                      |
| 16    | g.72802230C>T | <i>CYP1A1</i> +262  | <b>ss159100336</b> | C  | T  | C         | 0/12                        | 0/14                          | 0/8                       | 0/24                       | 0/16                            | 1/8                          | 0/8                       | 0/16                      |
| 17    | g.72802259A>G | <i>CYP1A1</i> +233  | <b>rs17861094</b>  | A  | G  | A         | 1/12                        | 0/14                          | 0/8                       | 0/24                       | 0/16                            | 0/8                          | 0/8                       | 0/16                      |

| SNP # | SNP Name      | Relative Position | NCBI Assignment | A1 | A2 | Ancestral | P <sub>A2</sub> in Africans | P <sub>A2</sub> in Caucasians | P <sub>A2</sub> in Asians | P <sub>A2</sub> in Samoans | P <sub>A2</sub> in New Guineans | P <sub>A2</sub> in Pehuenche | P <sub>A2</sub> in Teribe | P <sub>A2</sub> in Dogrib |
|-------|---------------|-------------------|-----------------|----|----|-----------|-----------------------------|-------------------------------|---------------------------|----------------------------|---------------------------------|------------------------------|---------------------------|---------------------------|
| 18    | g.72802358C>T | CYP1A1 +134       | rs4646422       | C  | T  | C         | 0/12                        | 0/14                          | 2/8                       | 5/24                       | 0/16                            | 0/8                          | 0/8                       | 0/16                      |
| 19    | g.72803245G>A | CYP1A1 -754       | rs4646421       | G  | A  | G         | 1/8                         | 1/14                          | 3/8                       | 13/24                      | 15/16                           | 7/8                          | 3/8                       | 4/14                      |
| 20    | g.72803860A>C | CYP1A1 -1369      | rs17861097      | A  | C  | A         | 1/12                        | 0/14                          | 0/8                       | 0/24                       | 0/16                            | 0/8                          | 0/8                       | 0/16                      |
| 21    | g.72804229C>A | CYP1A1 -1738      | rs2606345       | C  | A  | C         | 1/12                        | 8/14                          | 0/8                       | 1/24                       | 0/16                            | 1/8                          | 3/8                       | 2/16                      |
| 22    | g.72805066G>A | CYP1A1 -2575      | ss159100337     | G  | A  | G         | 0/12                        | 0/14                          | 0/8                       | 0/22                       | 0/16                            | 0/8                          | 0/8                       | 1/16                      |
| 23    | g.72805087G>A | CYP1A1 -2596      | ss159100338     | G  | A  | G         | 0/12                        | 0/14                          | 0/8                       | 0/24                       | 1/16                            | 0/8                          | 0/8                       | 0/16                      |
| 24    | g.72805088G>A | CYP1A1 -2597      | ss159100339     | G  | A  | G         | 0/12                        | 0/14                          | 0/8                       | 0/24                       | 2/16                            | 0/8                          | 0/8                       | 0/16                      |
| 25    | g.72805175G>A | CYP1A1 -2684      | ss159100340     | G  | A  | G         | 0/12                        | 0/14                          | 0/8                       | 1/22                       | 0/16                            | 0/8                          | 0/8                       | 0/16                      |
| 26    | g.72805393C>T | CYP1A1 -2902      | rs17861099      | C  | T  | C         | 0/12                        | 1/14                          | 0/8                       | 0/24                       | 0/16                            | 0/8                          | 0/8                       | 0/16                      |
| 27    | g.72805943A>C | CYP1A1 -3452      | rs3826041       | A  | C  | C*        | 8/10                        | 2/14                          | 4/8                       | 15/24                      | 11/12                           | 7/8                          | 3/8                       | 7/16                      |
| 28    | g.72805958C>T | CYP1A1 -3467      | rs3826042       | C  | T  | C         | 0/10                        | 1/14                          | 1/8                       | 2/24                       | 0/12                            | 0/8                          | 0/8                       | 2/16                      |
| 29    | g.72805984G>C | CYP1A1 -3493      | rs4646417       | G  | C  | G         | 2/10                        | 0/14                          | 0/8                       | 0/24                       | 0/16                            | 0/8                          | 0/8                       | 0/16                      |
| 30    | g.72806502C>T | CYP1A1 -4011      | rs2470893       | C  | T  | C         | 0/10                        | 1/10                          | 0/8                       | 0/24                       | 0/16                            | 0/8                          | 0/8                       | 0/16                      |
| 31    | g.72806896T>C | CYP1A1 -4405      | rs7495708       | T  | C  | C*        | 9/12                        | 2/12                          | 4/8                       | 15/24                      | 9/10                            | 7/8                          | 3/8                       | 7/16                      |
| 32    | g.72807071G>A | CYP1A1 -4580      | rs17861107      | G  | A  | G         | 2/6                         | 0/12                          | 0/6                       | 0/24                       | 0/16                            | 0/8                          | 0/8                       | 0/16                      |
| 33    | g.72807300C>A | CYP1A1 -4809      | rs17861108      | C  | A  | C         | 3/10                        | 0/14                          | 0/8                       | 0/24                       | 0/16                            | 0/8                          | 0/8                       | 0/16                      |
| 34    | g.72807303C>A | CYP1A1 -4812      | rs17861109      | C  | A  | C         | 3/10                        | 1/12                          | 3/8                       | 13/24                      | 15/16                           | 7/8                          | 3/8                       | 3/14                      |
| 35    | g.72809516C>G | CYP1A1 -7025      | rs17861110      | C  | G  | C         | 0/12                        | 0/14                          | 1/8                       | 2/24                       | 0/16                            | 7/8                          | 3/8                       | 4/16                      |
| 36    | g.72810325A>C | CYP1A1 -7834      | rs17861111      | A  | C  | A         | 1/12                        | 0/8                           | 0/8                       | 0/24                       | 0/16                            | 0/8                          | 0/8                       | 0/16                      |

| SNP # | SNP Name      | Relative Position | NCBI Assignment | A1 | A2 | Ancestral | P <sub>A2</sub> in Africans | P <sub>A2</sub> in Caucasians | P <sub>A2</sub> in Asians | P <sub>A2</sub> in Samoans | P <sub>A2</sub> in New Guineans | P <sub>A2</sub> in Pehuenche | P <sub>A2</sub> in Teribe | P <sub>A2</sub> in Dogrib |
|-------|---------------|-------------------|-----------------|----|----|-----------|-----------------------------|-------------------------------|---------------------------|----------------------------|---------------------------------|------------------------------|---------------------------|---------------------------|
| 37    | g.72810752A>G | CYP1A1<br>-8261   | rs936225        | A  | G  | A         | 1/12                        | 0/14                          | 0/8                       | 0/24                       | 0/16                            | 0/8                          | 0/8                       | 0/16                      |
| 38    | g.72811935G>A | CYP1A1<br>-9444   | rs17861113      | G  | A  | G         | 0/12                        | 0/14                          | 1/8                       | 0/24                       | 0/16                            | 0/8                          | 0/8                       | 0/16                      |
| 39    | g.72812040C>T | CYP1A1<br>-9549   | rs17861114      | C  | T  | C         | 0/12                        | 1/14                          | 0/8                       | 0/24                       | 0/16                            | 0/8                          | 0/8                       | 0/16                      |
| 40    | g.72812273C>G | CYP1A1<br>-9782   | ss159100341     | C  | G  | C         | 0/12                        | 0/14                          | 0/8                       | 0/24                       | 0/16                            | 0/8                          | 0/8                       | 2/16                      |
| 41    | g.72812385C>T | CYP1A1<br>-9894   | rs17861115      | C  | T  | C         | 0/12                        | 0/14                          | 2/8                       | 2/24                       | 0/16                            | 7/8                          | 3/8                       | 5/16                      |
| 42    | g.72812867T>C | CYP1A1<br>-10376  | rs12441817      | T  | C  | T         | 1/12                        | 1/14                          | 5/8                       | 16/24                      | 15/16                           | 7/8                          | 3/8                       | 5/16                      |
| 43    | g.72813041C>T | CYP1A1<br>-10550  | rs4886605       | C  | T  | T*        | 9/12                        | 2/14                          | 6/8                       | 18/24                      | 15/16                           | 7/8                          | 3/8                       | 7/14                      |
| 44    | g.72813202G>A | CYP1A1<br>-10711  | rs17861118      | G  | A  | G         | 0/12                        | 1/14                          | 0/8                       | 0/24                       | 0/16                            | 0/8                          | 0/8                       | 0/16                      |
| 45    | g.72813680C>A | CYP1A1<br>-11189  | rs11631784      | C  | A  | C         | 4/12                        | 0/14                          | 0/8                       | 0/24                       | 0/16                            | 0/8                          | 0/8                       | 0/16                      |
| 46    | g.72814232A>G | CYP1A1<br>-11741  | rs17861120      | A  | G  | A         | 1/12                        | 1/14                          | 4/8                       | 15/22                      | 15/16                           | 7/8                          | 3/8                       | 5/16                      |
| 47    | g.72814485G>A | CYP1A1<br>-11994  | rs17861121      | G  | A  | G         | 2/12                        | 0/14                          | 0/8                       | 0/24                       | 0/16                            | 0/8                          | 0/8                       | 0/16                      |
| 48    | g.72818979C>T | CYP1A2<br>-10154  | rs17861122      | C  | T  | C         | 1/12                        | 0/14                          | 0/8                       | 0/24                       | 0/16                            | 0/8                          | 0/8                       | 0/16                      |
| 49    | g.72818980G>A | CYP1A2<br>-10153  | rs11632547      | G  | A  | G         | 1/12                        | 1/14                          | 1/8                       | 0/24                       | 0/16                            | 1/8                          | 0/8                       | 2/16                      |
| 50    | g.72819195A>T | CYP1A2<br>-9938   | rs17861124      | A  | T  | T*        | 2/12                        | 1/14                          | 1/8                       | 0/24                       | 0/16                            | 1/8                          | 0/8                       | 2/16                      |
| 51    | g.72819208G>A | CYP1A2<br>-9925   | rs17861125      | G  | A  | A*        | 2/12                        | 1/14                          | 1/8                       | 0/24                       | 0/16                            | 1/8                          | 0/8                       | 2/16                      |
| 52    | g.72819500C>T | CYP1A2<br>-9633   | rs11632706      | C  | T  | T*        | 2/12                        | 1/14                          | 1/8                       | 0/24                       | 0/16                            | 1/8                          | 0/8                       | 2/16                      |
| 53    | g.72819544G>A | CYP1A2<br>-9589   | rs11632814      | G  | A  | A*        | 2/12                        | 1/14                          | 1/8                       | 0/24                       | 0/16                            | 1/8                          | 0/8                       | 2/16                      |
| 54    | g.72819640G>A | CYP1A2<br>-9493   | rs16972208      | G  | A  | G         | 2/12                        | 0/14                          | 2/8                       | 10/24                      | 0/16                            | 7/8                          | 3/8                       | 5/16                      |
| 55    | g.72819929C>T | CYP1A2<br>-9204   | rs11633861      | C  | T  | C         | 1/12                        | 1/14                          | 1/8                       | 0/24                       | 0/16                            | 1/8                          | 0/8                       | 2/16                      |



| SNP # | SNP Name      | Relative Position | NCBI Assignment | A1 | A2 | Ancestral | P <sub>A2</sub> in Africans | P <sub>A2</sub> in Caucasians | P <sub>A2</sub> in Asians | P <sub>A2</sub> in Samoans | P <sub>A2</sub> in New Guineans | P <sub>A2</sub> in Pehuenche | P <sub>A2</sub> in Teribe | P <sub>A2</sub> in Dogrib |
|-------|---------------|-------------------|-----------------|----|----|-----------|-----------------------------|-------------------------------|---------------------------|----------------------------|---------------------------------|------------------------------|---------------------------|---------------------------|
| 56    | g.72820071A>C | CYP1A2<br>-9062   | ss159100342     | A  | C  | A         | 0/12                        | 0/14                          | 0/8                       | 2/24                       | 0/16                            | 0/8                          | 0/8                       | 0/16                      |
| 57    | g.72820286G>T | CYP1A2<br>-8847   | ss159100343     | G  | T  | G         | 0/12                        | 0/14                          | 0/8                       | 0/24                       | 3/16                            | 0/8                          | 0/8                       | 0/16                      |
| 58    | g.72820374G>T | CYP1A2<br>-8759   | rs17861130      | G  | T  | G         | 0/10                        | 0/14                          | 1/8                       | 0/24                       | 0/16                            | 0/8                          | 0/8                       | 0/16                      |
| 59    | g.72820453A>G | CYP1A2<br>-8680   | rs2472299       | A  | G  | G*        | 8/10                        | 9/14                          | 6/8                       | 19/24                      | 13/16                           | 8/8                          | 3/8                       | 9/16                      |
| 60    | g.72820546G>A | CYP1A2<br>-8587   | rs17861132      | G  | A  | G         | 2/12                        | 0/14                          | 0/8                       | 0/24                       | 0/16                            | 0/8                          | 0/8                       | 0/16                      |
| 61    | g.72820629G>A | CYP1A2<br>-8504   | rs17861133      | G  | A  | G         | 1/12                        | 0/14                          | 0/8                       | 0/24                       | 0/16                            | 0/8                          | 0/8                       | 0/16                      |
| 62    | g.72820857G>A | CYP1A2<br>-8276   | rs17861134      | G  | A  | G         | 1/12                        | 0/14                          | 0/8                       | 0/24                       | 0/16                            | 0/8                          | 0/8                       | 0/16                      |
| 63    | g.72820915C>T | CYP1A2<br>-8218   | rs17861135      | C  | T  | C         | 1/12                        | 0/14                          | 0/8                       | 0/24                       | 0/16                            | 0/8                          | 0/8                       | 0/16                      |
| 64    | g.72820962A>G | CYP1A2<br>-8171   | rs2472300       | A  | G  | G*        | 9/12                        | 9/14                          | 6/8                       | 19/24                      | 13/16                           | 8/8                          | 3/8                       | 9/16                      |
| 65    | g.72821129T>C | CYP1A2<br>-8004   | rs17861137      | T  | C  | T         | 1/12                        | 0/14                          | 0/8                       | 0/24                       | 0/16                            | 0/8                          | 0/8                       | 0/16                      |
| 66    | g.72821229G>T | CYP1A2<br>-7904   | rs17861138      | G  | T  | G         | 1/12                        | 1/14                          | 1/8                       | 0/24                       | 0/16                            | 1/8                          | 0/8                       | 2/16                      |
| 67    | g.72821686A>G | CYP1A2<br>-7447   | rs17861139      | A  | G  | ?         | 2/12                        | 1/14                          | 1/8                       | 0/22                       | 0/16                            | 1/8                          | 0/8                       | 2/16                      |
| 68    | g.72821975G>A | CYP1A2<br>-7158   | rs17861140      | G  | A  | G         | 4/12                        | 0/14                          | 2/8                       | 9/22                       | 0/16                            | 7/8                          | 3/8                       | 5/16                      |
| 69    | g.72822042C>T | CYP1A2<br>-7091   | rs17861141      | C  | T  | T*        | 2/12                        | 1/14                          | 1/8                       | 0/24                       | 0/16                            | 1/8                          | 0/8                       | 2/16                      |
| 70    | g.72822176G>A | CYP1A2<br>-6957   | rs17861142      | G  | A  | G         | 2/12                        | 1/14                          | 1/8                       | 0/24                       | 0/16                            | 1/8                          | 0/8                       | 2/16                      |
| 71    | g.72822309T>C | CYP1A2<br>-6824   | rs2445618       | T  | C  | C*        | 9/12                        | 9/14                          | 6/8                       | 19/24                      | 13/16                           | 8/8                          | 3/8                       | 9/16                      |
| 72    | g.72822437A>G | CYP1A2<br>-6696   | rs17861145      | A  | G  | A         | 2/12                        | 1/14                          | 1/8                       | 0/24                       | 0/16                            | 1/8                          | 0/8                       | 2/16                      |
| 73    | g.72827329A>G | CYP1A2<br>-1804   | rs2069524       | A  | G  | A         | 1/12                        | 1/14                          | 1/8                       | 0/24                       | 0/16                            | 1/8                          | 0/8                       | 2/16                      |
| 74    | g.72827425T>C | CYP1A2<br>-1708   | rs2069525       | T  | C  | C*        | 2/12                        | 1/14                          | 1/8                       | 0/24                       | 0/16                            | 1/8                          | 0/8                       | 2/16                      |

| SNP # | SNP Name      | Relative Position | NCBI Assignment | A1 | A2 | Ancestral | P <sub>A2</sub> in Africans | P <sub>A2</sub> in Caucasians | P <sub>A2</sub> in Asians | P <sub>A2</sub> in Samoans | P <sub>A2</sub> in New Guineans | P <sub>A2</sub> in Pehuenche | P <sub>A2</sub> in Teribe | P <sub>A2</sub> in Dogrib |
|-------|---------------|-------------------|-----------------|----|----|-----------|-----------------------------|-------------------------------|---------------------------|----------------------------|---------------------------------|------------------------------|---------------------------|---------------------------|
| 75    | g.72828394T>G | CYP1A2<br>-739    | rs2069526       | T  | G  | G*        | 2/12                        | 1/14                          | 1/8                       | 0/24                       | 0/16                            | 1/8                          | 0/8                       | 2/16                      |
| 76    | g.72828400G>C | CYP1A2<br>-733    | rs28399417      | G  | C  | G         | 0/12                        | 0/14                          | 0/8                       | 2/24                       | 0/16                            | 0/8                          | 0/8                       | 0/16                      |
| 77    | g.72828784C>G | CYP1A2<br>-349    | rs17861149      | C  | G  | C         | 1/12                        | 0/14                          | 0/8                       | 0/24                       | 0/16                            | 0/8                          | 0/8                       | 0/16                      |
| 78    | g.72828955G>A | CYP1A2<br>-178    | rs17861150      | G  | A  | G         | 2/12                        | 0/14                          | 0/8                       | 0/24                       | 0/16                            | 0/8                          | 0/8                       | 0/16                      |
| 79    | g.72828970C>A | CYP1A2<br>-163    | rs762551        | C  | A  | A*        | 9/12                        | 9/14                          | 6/8                       | 19/24                      | 13/16                           | 8/8                          | 3/8                       | 9/16                      |
| 80    | g.72829185C>G | CYP1A2<br>+53     | rs17861152      | C  | G  | C         | 1/12                        | 0/14                          | 0/8                       | 0/24                       | 0/16                            | 0/8                          | 0/8                       | 0/16                      |
| 81    | g.72829381G>T | CYP1A2<br>+249    | rs17861153      | G  | T  | G         | 0/12                        | 0/14                          | 1/8                       | 0/24                       | 0/16                            | 0/8                          | 0/8                       | 0/16                      |
| 82    | g.72829438C>T | CYP1A2<br>+306    | rs17861154      | C  | T  | C         | 0/12                        | 1/14                          | 0/8                       | 0/24                       | 0/16                            | 0/8                          | 0/8                       | 0/16                      |
| 83    | g.72829747C>T | CYP1A2<br>+615    | rs17861155      | C  | T  | C         | 1/12                        | 0/14                          | 0/8                       | 0/24                       | 0/16                            | 0/8                          | 0/8                       | 0/16                      |
| 84    | g.72830334C>T | CYP1A2<br>+1202   | rs4646425       | C  | T  | C         | 0/12                        | 1/14                          | 1/8                       | 0/24                       | 0/16                            | 1/8                          | 0/8                       | 2/16                      |
| 85    | g.72830564T>C | CYP1A2<br>+1432   | ss159100344     | T  | C  | T         | 0/12                        | 0/14                          | 0/8                       | 1/24                       | 0/16                            | 0/8                          | 0/8                       | 0/16                      |
| 86    | g.72830645C>A | CYP1A2<br>+1513   | rs17861157      | C  | A  | C         | 2/12                        | 0/14                          | 0/8                       | 0/24                       | 0/16                            | 0/8                          | 0/8                       | 0/16                      |
| 87    | g.72830646G>A | CYP1A2<br>+1514   | rs35796837      | G  | A  | G         | 0/12                        | 0/14                          | 0/8                       | 2/24                       | 7/16                            | 0/8                          | 0/8                       | 0/16                      |
| 88    | g.72830947C>A | CYP1A2<br>+1815   | ss159100345     | C  | A  | C         | 0/12                        | 0/14                          | 0/8                       | 0/24                       | 1/16                            | 0/8                          | 0/8                       | 0/16                      |
| 89    | g.72831290G>A | CYP1A2<br>+2159   | rs2472304       | G  | A  | G         | 0/12                        | 8/14                          | 3/8                       | 3/24                       | 0/16                            | 0/8                          | 0/8                       | 2/16                      |
| 90    | g.72831453G>C | CYP1A2<br>+2321   | rs3743484       | G  | C  | G         | 0/12                        | 0/14                          | 0/8                       | 7/24                       | 13/16                           | 0/8                          | 0/8                       | 0/16                      |
| 91    | g.72831746G>A | CYP1A2<br>+2614   | rs17861159      | G  | A  | G         | 1/12                        | 0/14                          | 0/8                       | 0/24                       | 0/16                            | 0/8                          | 0/8                       | 0/16                      |
| 92    | g.72832260G>C | CYP1A2<br>+3128   | ss159100346     | G  | C  | G         | 0/12                        | 0/14                          | 0/8                       | 5/24                       | 6/16                            | 0/8                          | 0/8                       | 0/16                      |
| 93    | g.72832387C>A | CYP1A2<br>+3255   | ss159100347     | C  | A  | C         | 0/12                        | 0/14                          | 0/8                       | 1/24                       | 0/16                            | 0/8                          | 0/8                       | 0/16                      |

| SNP # | SNP Name      | Relative Position | NCBI Assignment | A1 | A2 | Ancestral | P <sub>A2</sub> in Africans | P <sub>A2</sub> in Caucasians | P <sub>A2</sub> in Asians | P <sub>A2</sub> in Samoans | P <sub>A2</sub> in New Guineans | P <sub>A2</sub> in Pehuenche | P <sub>A2</sub> in Teribe | P <sub>A2</sub> in Dogrib |
|-------|---------------|-------------------|-----------------|----|----|-----------|-----------------------------|-------------------------------|---------------------------|----------------------------|---------------------------------|------------------------------|---------------------------|---------------------------|
| 94    | g.72832745T>C | CYP1A2 +3613      | rs4646427       | T  | C  | T         | 1/12                        | 1/14                          | 1/8                       | 0/24                       | 0/16                            | 1/8                          | 0/8                       | 2/16                      |
| 95    | g.72833457T>C | CYP1A2 +4325      | ss159100348     | T  | C  | T         | 0/12                        | 0/14                          | 0/8                       | 0/24                       | 1/16                            | 0/8                          | 0/8                       | 0/16                      |
| 96    | g.72833665A>G | CYP1A2 +4533      | ss159100349     | A  | G  | A         | 0/12                        | 0/14                          | 0/8                       | 0/24                       | 1/16                            | 0/8                          | 0/8                       | 0/16                      |
| 97    | g.72834479C>T | CYP1A2 +5347      | rs2470890       | C  | T  | C         | 0/12                        | 8/14                          | 3/8                       | 2/24                       | 0/16                            | 0/8                          | 0/8                       | 2/16                      |
| 98    | g.72834527C>T | CYP1A2 +5395      | ss159100350     | C  | T  | C         | 0/12                        | 0/14                          | 0/8                       | 0/24                       | 0/16                            | 0/8                          | 0/8                       | 1/16                      |
| 99    | g.72835806C>G | CYP1A2 +6674      | rs17861162      | C  | G  | C         | 2/12                        | 1/14                          | 1/8                       | 7/24                       | 12/14                           | 1/8                          | 0/8                       | 2/16                      |
| 100   | g.72835817A>G | CYP1A2 +6685      | rs17861163      | A  | G  | A         | 1/12                        | 0/14                          | 0/8                       | 0/24                       | 0/16                            | 0/8                          | 0/8                       | 0/16                      |
| 101   | g.72836881G>A | CYP1A2 +7749      | rs17861164      | G  | A  | G         | 1/12                        | 0/14                          | 0/8                       | 0/24                       | 0/16                            | 0/8                          | 0/8                       | 0/16                      |
| 102   | g.72836996G>A | CYP1A2 +7864      | rs2960192       | G  | A  | G         | 0/12                        | 8/14                          | 3/8                       | 2/24                       | 0/16                            | 0/8                          | 0/8                       | 2/16                      |

Frequencies were obtained from resequencing data [current study plus (Jiang et al., 2005)] of 106 chromosomes: 12 African, 14 Caucasian, 8 Asian, 24 Samoan, 16 New Guinean, 8 Pehuenche, 8 Teribe and 16 Dogrib. A1 and A2 refer to the sequence of the reference and the alternative/mutant alleles of each SNP, respectively. The 21 segregating sites (*denoted in red*) represent those where the predominant allele in human differed from that in a nonhuman primate. The ancestral allele at most sites was inferred from the predominant homologous sequence of chimpanzee, except for SNP *CYP1A2* +1815, whose sequence corresponds to that of the orangutan. If the predominant sequence in human differed from that of chimpanzee, we searched for the sequence in orangutan or gorilla (see Supp. Table S6). In those sites where the sequence information was available, the sequence predominant in at least two species was considered ancestral; otherwise, the sequence in chimpanzee was considered ancestral. A total of 19 sites in humans (marked \* in the ancestral column) seem to have diverged from the ancestral state. The sequence of SNP *CYP1A2* -7447 seems to be exclusively human and is not present in the other primates. P<sub>A2</sub> is the frequency of the alternative/mutant allele A2. Relative positions listed are calculated with respect to the translation start codon. To transform these to positions relative to the TSS and for color code, see Supp. Table S1 legend.

**SUPP. TABLE S5. Predicted AHRE Motifs in the BDP Region of *CYP1A1\_CYP1A2* Locus\***

| Strand | Position relative to <i>CYP1A1</i> TTS | Position relative to <i>CYP1A2</i> TSS | Position relative to translation start site | AHRE sequence (+) strand | AHRE sequence (-) strand | E- value | Reported previously                         |
|--------|----------------------------------------|----------------------------------------|---------------------------------------------|--------------------------|--------------------------|----------|---------------------------------------------|
| +      | -386                                   | -22921                                 | <i>CYP1A1</i> -2825                         | GGGCGTGC                 |                          | 0.094    | present study                               |
| +      | -489                                   | -22818                                 | <i>CYP1A1</i> -2928                         | TCGCGTGA                 |                          | 0.041    | (Jaiswal et al., 1985; Kubota et al., 1991) |
| +      | -884                                   | -22423                                 | <i>CYP1A1</i> -3323                         | TTGCGTGC                 |                          | 0.018    | (Jaiswal et al., 1985; Kubota et al., 1991) |
| +      | -972                                   | -22335                                 | <i>CYP1A1</i> -3411                         | TTGCGTGA                 |                          | 0.036    | (Jaiswal et al., 1985; Kubota et al., 1991) |
| -      | -1053                                  | -22261                                 | <i>CYP1A1</i> -3492                         | TCACGCGA                 | TCGCGTGA                 | 0.041    | (Jaiswal et al., 1985; Kubota et al., 1991) |
| +      | -1371                                  | -21936                                 | <i>CYP1A1</i> -3810                         | TTGCGTGC                 |                          | 0.018    | (Jaiswal et al., 1985; Kubota et al., 1991) |
| -      | -2114                                  | -21200                                 | <i>CYP1A1</i> -4553                         | TCACGCCA                 | TGGCGTGA                 | 0.084    | (Jaiswal et al., 1985; Kubota et al., 1991) |
| +      | -3065                                  | -20242                                 | <i>CYP1A1</i> -5504                         | TGGCGTGA                 |                          | 0.084    | (Kubota et al., 1991)                       |
| +      | -5601                                  | -17706                                 | <i>CYP1A1</i> -8040                         | TTGCGTGA                 |                          | 0.036    | (Corchero et al., 2001)                     |
| +      | -7504                                  | -15803                                 | <i>CYP1A1</i> -9943                         | GTGCGTGA                 |                          | 0.075    | present study                               |
| -      | -12210                                 | -11097                                 | <i>CYP1A2</i> -11993                        | TCACGCCA                 | TGGCGTGA                 | 0.084    | (Corchero et al., 2001)                     |
| +      | -12381                                 | -10926                                 | <i>CYP1A2</i> -11822                        | TGGCGTGA                 |                          | 0.084    | (Corchero et al., 2001)                     |
| +      | -15058                                 | -8249                                  | <i>CYP1A2</i> -9145                         | TAGCGTGC                 |                          | 0.061    | (Corchero et al., 2001)                     |

| <b>Strand</b> | <b>Position relative to <i>CYP1A1</i> TTS</b> | <b>Position relative to <i>CYP1A2</i> TSS</b> | <b>Position relative to translation start site</b> | <b>AHRE sequence (+) strand</b> | <b>AHRE sequence (-) strand</b> | <b>E- value</b> | <b>Reported previously</b>   |
|---------------|-----------------------------------------------|-----------------------------------------------|----------------------------------------------------|---------------------------------|---------------------------------|-----------------|------------------------------|
| –             | –18606                                        | –4701                                         | <i>CYP1A2</i> –5597                                | TCACGCCA                        | TGGCGTGA                        | 0.084           | (Corchero et al., 2001)      |
| –             | –20813                                        | –2494                                         | <i>CYP1A2</i> –3390                                | ACACGCAC                        | GTGCGTGT                        | 0.089           | (Quattrochi and Tukey, 1989) |

\*Location (TSS = transcription start site) and characteristics of 15 AHREs predicted by the software MAPPER. The entire sequence of the BDP of the *CYP1A1\_CYP1A2* locus (23,306 bp) was considered for the query, whilst model M00235 from Transfac (TTGCGTGC) provided the consensus sequence for the AHRE, *i.e.* binding-site of the AHR-ARNT heterodimer. The software found 15 hits having E-values below 0.10 and 27 hits with E-values >0.10 (the latter not shown). E-values refer to the statistical significance of hits, *i.e.* the probability of finding a “good hit” by chance alone in a non-homologous sequence.

**SUPP. TABLE S6. Sequences of 21 Divergent Segregating Sites (between Human and Chimpanzee, Orangutan or Gorilla)**

|       |               |                         |                   | Human |          |            |           |         |           |                         |
|-------|---------------|-------------------------|-------------------|-------|----------|------------|-----------|---------|-----------|-------------------------|
| SNP # | SNP Name      | Relative Position       | NCBI Assignment   | A1    | A2       | Chimpanzee | Orangutan | Gorilla | Ancestral | Commentary              |
| 3     | g.72798264A>G | <i>CYP1A1</i><br>+4228  | <b>rs17861082</b> | A     | G        | G          | T         |         | –         | Recurrent mutation      |
| 6     | g.72799170C>A | <i>CYP1A1</i><br>+3322  | <b>rs17861085</b> | C     | <b>A</b> | <b>A</b>   | A         |         | A         |                         |
| 8     | g.72799260A>G | <i>CYP1A1</i><br>+3232  | <b>rs4986884</b>  | A     | G        | G          | –         | T       | –         | Recurrent mutation      |
| 9     | g.72799524T>C | <i>CYP1A1</i><br>+2968  | <b>rs4986882</b>  | T     | <b>C</b> | <b>C</b>   | C         |         | C         |                         |
| 10    | g.72799540G>C | <i>CYP1A1</i><br>+2952  | <b>rs4986881</b>  | G     | <b>C</b> | <b>C</b>   | –         | C       | C         |                         |
| 27    | g.72805943A>C | <i>CYP1A1</i><br>–3452  | <b>rs3826041</b>  | A     | <b>C</b> | <b>C</b>   | C         |         | C         |                         |
| 31    | g.72806896T>C | <i>CYP1A1</i><br>–4405  | <b>rs7495708</b>  | T     | <b>C</b> | <b>C</b>   | C         |         | C         |                         |
| 39    | g.72812040C>T | <i>CYP1A1</i><br>–9549  | <b>rs17861114</b> | C     | T        | <b>T*</b>  | C         |         | C         |                         |
| 42    | g.72812867T>C | <i>CYP1A1</i><br>–10376 | <b>rs12441817</b> | T     | C        | <b>C*</b>  | T         |         | T         |                         |
| 43    | g.72813041C>T | <i>CYP1A1</i><br>–10550 | <b>rs4886605</b>  | C     | <b>T</b> | <b>T</b>   | T         |         | T         |                         |
| 50    | g.72819195A>T | <i>CYP1A2</i><br>–9938  | <b>rs17861124</b> | A     | <b>T</b> | <b>T</b>   | T         |         | T         |                         |
| 51    | g.72819208G>A | <i>CYP1A2</i><br>–9925  | <b>rs17861125</b> | G     | A        | A          | –         |         | –         | Exclusively human/chimp |
| 52    | g.72819500C>T | <i>CYP1A2</i><br>–9633  | <b>rs11632706</b> | C     | <b>T</b> | <b>T</b>   | T         |         | T         |                         |
| 53    | g.72819544G>A | <i>CYP1A2</i><br>–9589  | <b>rs11632814</b> | G     | <b>A</b> | <b>A</b>   | A         |         | T         |                         |
| 59    | g.72820453A>G | <i>CYP1A2</i><br>–8680  | <b>rs2472299</b>  | A     | <b>G</b> | <b>G</b>   | G         |         | G         |                         |
| 64    | g.72820962A>G | <i>CYP1A2</i><br>–8171  | <b>rs2472300</b>  | A     | <b>G</b> | <b>G</b>   | G         |         | G         |                         |

|       |               |                        |                   | Human |          |            |           |         |           |                         |
|-------|---------------|------------------------|-------------------|-------|----------|------------|-----------|---------|-----------|-------------------------|
| SNP # | SNP Name      | Relative Position      | NCBI Assignment   | A1    | A2       | Chimpanzee | Orangutan | Gorilla | Ancestral | Commentary              |
| 69    | g.72822042C>T | <i>CYP1A2</i><br>-7091 | <b>rs17861141</b> | C     | T        | T          | -         |         | -         | Exclusively human/chimp |
| 71    | g.72822309T>C | <i>CYP1A2</i><br>-6824 | <b>rs2445618</b>  | T     | <b>C</b> | <b>C</b>   | C         |         | C         |                         |
| 74    | g.72827425T>C | <i>CYP1A2</i><br>-1708 | <b>rs2069525</b>  | T     | <b>C</b> | <b>C</b>   | C         |         | C         |                         |
| 75    | g.72828394T>G | <i>CYP1A2</i><br>-739  | <b>rs2069526</b>  | T     | <b>G</b> | <b>G</b>   | G         |         | G         |                         |
| 79    | g.72828970C>A | <i>CYP1A2</i><br>-163  | <b>rs762551</b>   | C     | A        | A          | -         |         | -         | Exclusively human/chimp |

A1 is the reference/predominant human allele and A2, the alternative/mutant one. There were 21 segregating sites, in which the predominant allele was different between human and chimpanzee (divergent sites). These were further analyzed to try to define their ancestral state; this was done by searching for the predominant allele in orangutan and, when the sequence was not present in this species, we also searched in gorilla. The ancestral state was chosen from the sequence predominant in two species; sites where it was not possible to ascertain an ancestral state were either found exclusively in human and chimp, or apparently have undergone recurrent mutations in nonhuman primates. In most cases (14 SNPs), humans diverged from the ancestral state; however, there were two exceptions (\*), in which chimpanzees diverged from the ancestral state.
